# Supplementary material
Source: PubMed Central journal article supplement (PMC3722307)
Supplement: NIHMS471541-supplement-01.pdf [file NIHMS471541-supplement-01.pdf]

## Supplementary Materials

### Titles and Legends for Supplementary Figures

**Supplementary Figure 1** (A) HCT-116 cells were continuously treated with 500 nM calcitriol. Untreated and calcitriol-treated cell samples were collected at 0h, 24h, 48h, and 72h. Cell number was determined using a hemacytometer and counting under a microscope. The data was used to calculate cell doubling time using an online doubling time calculator (<http://www.doubling-time.com/compute.php>). The experiment was repeated three times, data shown are mean values + S.D. (B and C) HCT-116 cells were treated with 500 nM calcitriol for 72 hours. Untreated and calcitriol-treated cells were labeled with BrdU for 30 min, washed and further cultured in normal growth media. At 0h, 4h, 8h, 12h, and 16h post labeling, the cells were stained with FITC-conjugated anti-BrdU antibody and propidium iodide as described in Materials and Methods, followed by flow cytometry analysis. The experiment was repeated three times; representative results of three independent experiments were shown. The percentages of BrdU-labeled cells in each phase of cell cycle were summarized in B, data shown are mean values + S.D. (\* $p < 0.05$ , \*\* $p < 0.01$ , \*\*\* $p < 0.001$ ).

**Supplementary Figure 2** (A) HCT-116 cells were treated with 500 nM calcitriol for 48 hours. ChIP assay was performed as described in Materials and Methods, using primers specific for the GDF15 promoter and the indicated antibodies. The experiment was repeated three times. Representative images of three independent experiments were shown. (B) HCT-116 cells were treated with 500 nM calcitriol for 48 hours. Total RNA was isolated and analyzed for *HOXA1* and *CCND1* expression by real-time PCR.

The experiments have been repeated three times, data shown are mean values + S.D. (\*\*p<0.01, \*\*\*p<0.001).

**Supplementary Figure 3** (A) HCT-116 cells were transfected with 100 nM negative control or JMJD1A specific siRNAs. Knockdown of JMJD1A was confirmed by western blot. Cell growth was determined at various time points after transfection by WST-1 assay. (B) HCT-116 cells were transfected with empty vector or pCEP4-JMJD1A plasmid to express Flag-tagged JMJD1A. This construct does not contain the JMJD1A 3'UTR, thus is not a target of miR-627. At 24h after plasmid transfection, cells were transfected with 100 nM negative control miRNA or miR-627 mimic. JMJD1A overexpression was confirmed by western blot. Cell growth was determined at various time points after miRNA transfection by WST-1 assay. The experiment was repeated three times, data shown are mean values + S.D. (\*\*p<0.01, \*\*\*p<0.001). The mean protein levels  $\pm$  S.D. are: siR-NC ( $1.0 \pm 0$ ), siR-JMJD1A ( $0.36 \pm 0.15$ ).

**Supplementary Figure 4** HCT-116 cells stably transfected with pRNAT-CMV3.2/Puro-3'UTR (to overexpress *JMJD1A* 3'UTR sponge and block miR-627) or pRNAT-CMV3.2/Puro-3'UTR-mut (to overexpress JMJD1A 3'UTR sponge with miR-627 binding site mutation) were treated with 500 nM calcitriol for 48h, and western blots were done using the indicated antibodies. Relative protein levels were quantified and shown under the gel. The experiment was repeated three times. The mean protein levels  $\pm$  S.D. are: left panel, Ctr ( $1.0 \pm 0$ ), Calcitriol ( $1.01 \pm 0.09$ ); right panel, Ctr ( $1.0 \pm 0$ ), Calcitriol ( $0.14 \pm 0.03$ ).

**Supplementary Figure 5** A diagram illustrates the mechanism of vitamin D regulation of miR-627 and JMJD1A.

### **Supplementary Materials and Methods**

**Drugs and Chemicals.** Calcitriol was purchased from Cayman Chemical. Bromodeoxyuridine was purchased from Sigma Aldrich.

**Creation of Stable Expression Cell Lines.** Stable cell lines expressing miR-627 or negative control miRNA were established by transfection of HCT-116 cells with Block-iT™ Pol II miR expression vectors: pcDNA6.2-GW/EmGFP-miR-627 or pcDNA6.2-GW/EmGFP-nega-control. Colonies were selected in Blasticidin-containing media and cloned with cloning cylinders. Overexpression of miR-627 was determined by real-time PCR analysis. The pRNAT-CMV3.2/Puro-3'UTR or pRNAT-CMV3.2/Puro-3'UTR-mut plasmids were transfected into HCT-116 cells, and cell lines stably expressing the JMJD1A 3'UTR sponge or miR-627 binding site mutated 3'UTR sponge were selected using Puromycin.

**WST-1 Assay.** *In vitro* cell proliferation was assessed with the WST-1 reagent (Roche). Briefly, WST-1 reagent was added to cell culture and incubated for 4h at 37°C. The absorbance of the formazan product was measured at 440 nm.

**Cell cycle analysis.** Cell cycle distribution was analyzed using an Accuri C6 Flow Cytometer. Cells were fixed and stained with propidium iodide using the Cell Cycle Phase Determination Kit (Accuri Cytometers) and analyzed following the manufacturer's

protocol. For BrdU labeling, BrdU was dissolved in PBS and added to culture medium at a final concentration of 10  $\mu$ M. After incubation for 30 min at 37 °C, the cells were rinsed twice with culture media and further cultured in normal growth media for various time. The cells were then washed with PBS and fixed in 70% ice-cold ethanol. The cells were washed and incubated in 2 N HCl for 30 min at room temperature for DNA denaturation. The cells were washed twice in PBS and then stained with FITC-conjugated anti-BrdU antibody (Enzo Life Sciences) and propidium iodide, followed by flow cytometry analysis.

**Cell doubling time.** The cell numbers were determined by using a hemacytometer and counting under a microscope, at 0h, 24h, 48h, and 72h. The data was used to calculate cell doubling time using an online doubling time calculator (<http://www.doubling-time.com/compute.php>).

**Detection of Apoptosis.** For annexin V staining, cells were washed with cold phosphate-buffered saline (PBS) and diluted in annexin-binding buffer at  $1 \times 10^6$  cells/ml. 5  $\mu$ l annexin V fluorescein conjugate (Invitrogen) was added to each 100  $\mu$ l of cell suspension and cells were incubated at room temperature for 15 minutes. After incubation, cells were analyzed by flow cytometry.

**A.**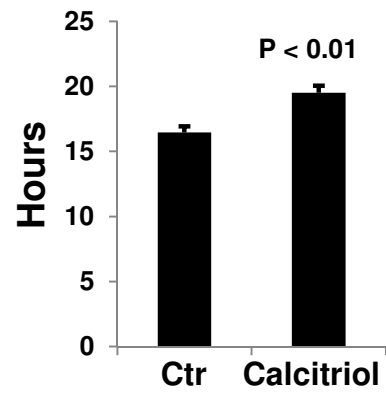**B.**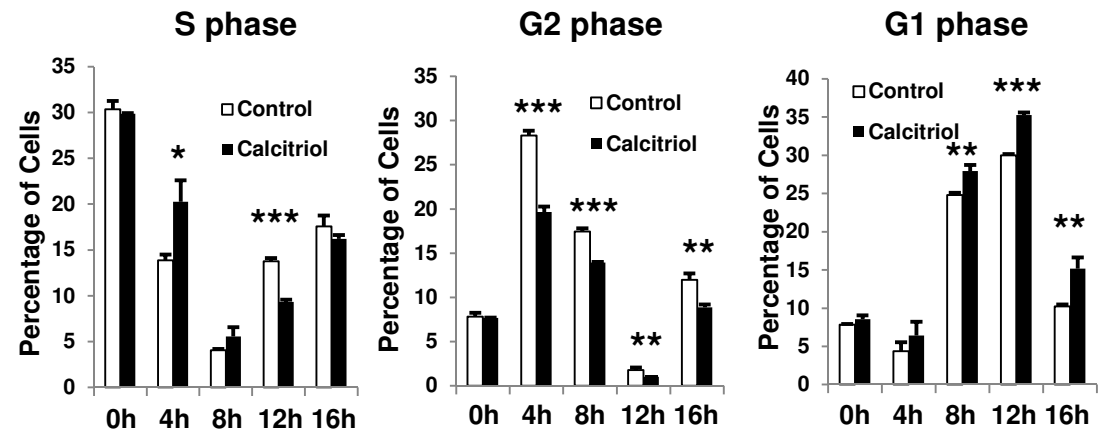**Supplementary Figure 1AB**

**C.****Control**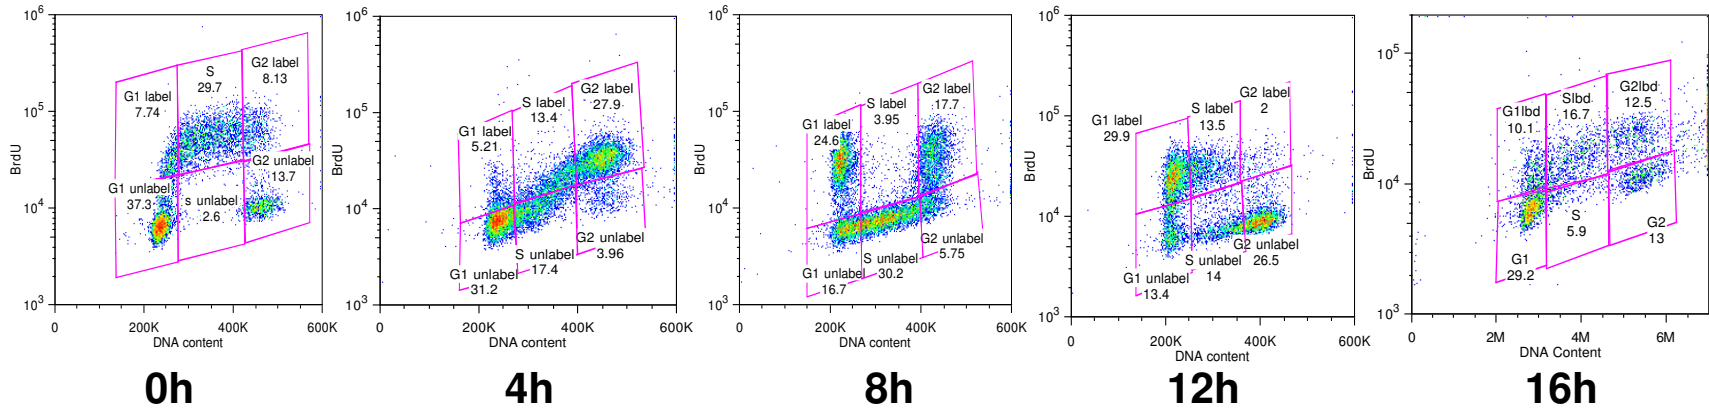**Calcitriol**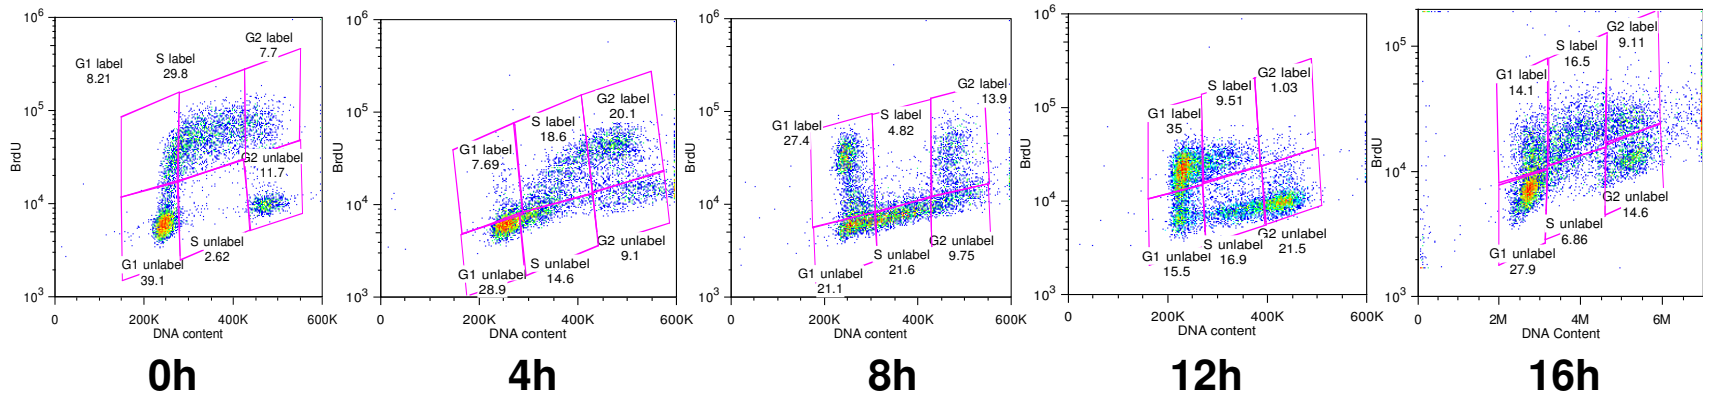**Supplementary Figure 1C**

**A.**

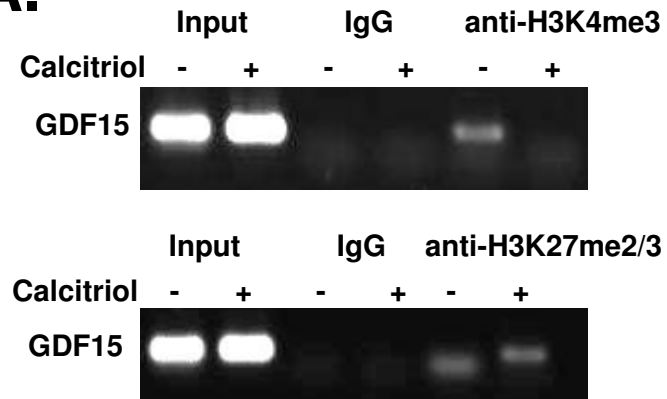

**B.**

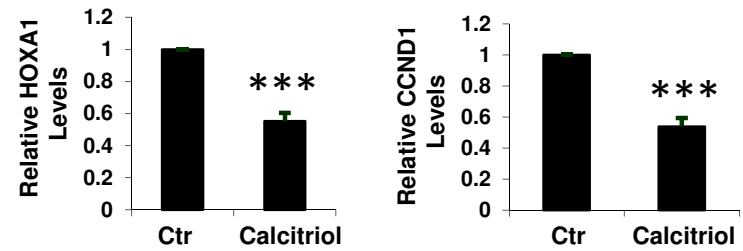

Supplementary Figure 2

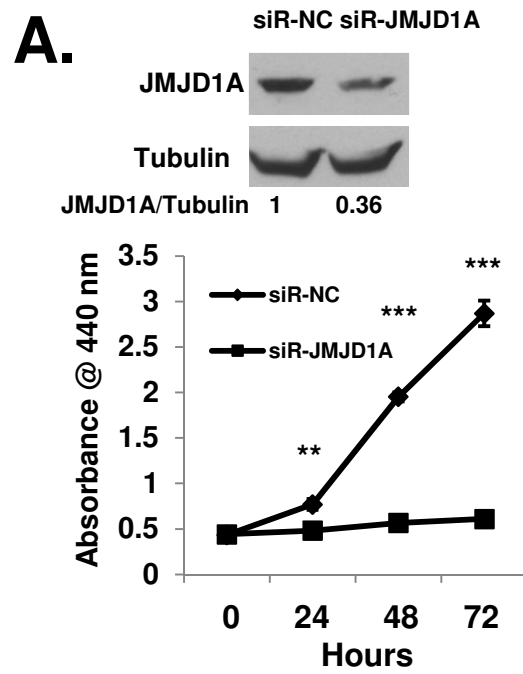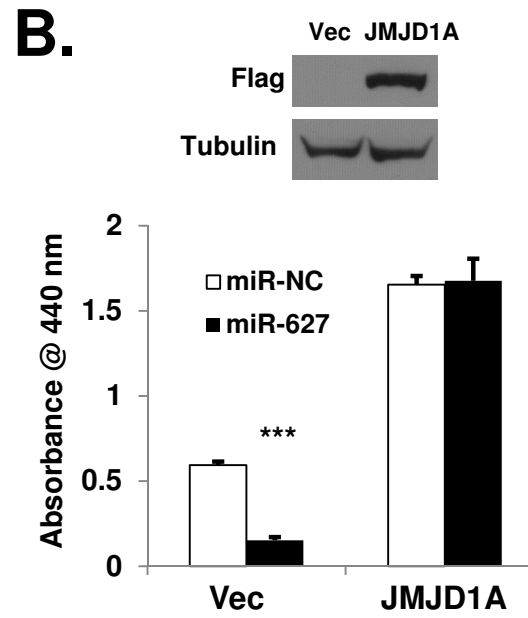

Supplementary Figure 3



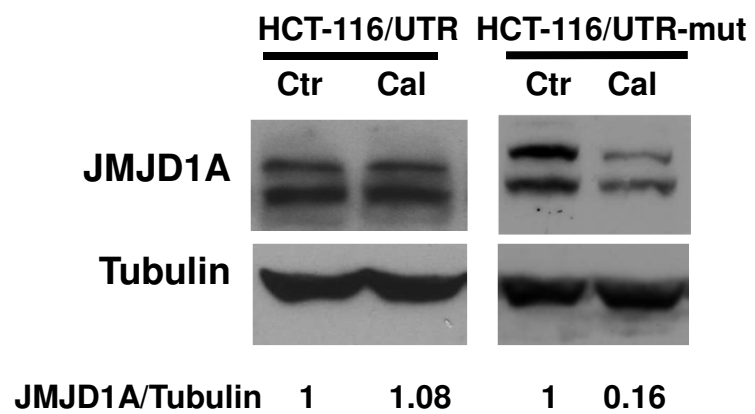

**Supplementary Figure 4**

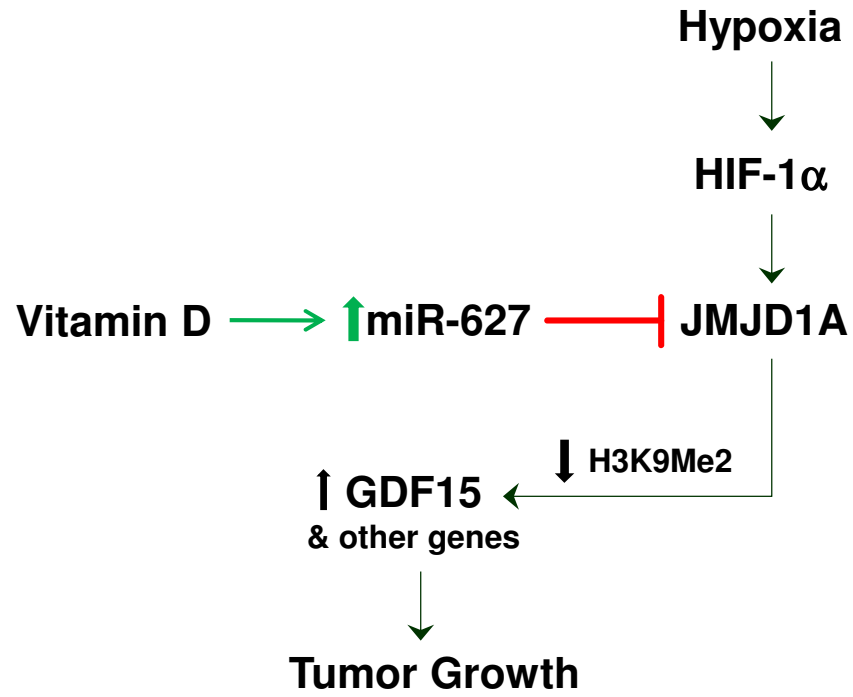

**Supplementary Figure 5**

Supplementary Table 1

**List of miRNAs that are Increased by Calcitriol**

| <b>Name of miRNA</b> | <b>Average Fluorescence Ratio<br/>of Calcitriol/Control</b> | <b>Standard Deviation</b> |
|----------------------|-------------------------------------------------------------|---------------------------|
| let-7g               | 1.279                                                       | 0.073                     |
| miR-28               | 1.342                                                       | 0.091                     |
| miR-346              | 1.345                                                       | 0.256                     |
| <b>miR-627</b>       | <b>6.458</b>                                                | <b>1.239</b>              |

The fold of changes in miRNA levels in calcitriol-treated cells comparing to control cells is indicated by the ratio of fluorescence of the two samples. For example, a ratio of 1.279 indicate 27.9% increase of the miRNA in the calcitriol-treated cells.

## List of miRNAs that are Decreased by Calcitriol

| <b>Name of miRNA</b> | <b>Average Fluorescence Ratio<br/>of Calcitriol/Control</b> | <b>Standard Deviation</b> |
|----------------------|-------------------------------------------------------------|---------------------------|
| miR-125a             | 0.486                                                       | 0.021                     |
| miR-133b             | 0.585                                                       | 0.1                       |
| miR-139              | 0.837                                                       | 0.1                       |
| miR-154              | 0.366                                                       | 0.061                     |
| miR-196a             | 0.669                                                       | 0.021                     |
| miR-26a              | 0.715                                                       | 0.057                     |
| miR-296              | 0.686                                                       | 0.071                     |
| miR-30b              | 0.47                                                        | 0.071                     |
| miR-33               | 0.709                                                       | 0.044                     |
| miR-491              | 0.471                                                       | 0.093                     |
| miR-499              | 0.553                                                       | 0.042                     |
| miR-517a             | 0.648                                                       | 0.017                     |
| miR-518a             | 0.37                                                        | 0.06                      |
| miR-532              | 0.667                                                       | 0.148                     |
| miR-549              | 0.526                                                       | 0.058                     |
| miR-553              | 0.834                                                       | 0.016                     |
| miR-557              | 0.365                                                       | 0.004                     |
| miR-571              | 0.62                                                        | 0.147                     |
| miR-579              | 0.627                                                       | 0.139                     |
| miR-591              | 0.57                                                        | 0.055                     |
| miR-595              | 0.613                                                       | 0.079                     |
| miR-597              | 0.555                                                       | 0.062                     |
| miR-600              | 0.57                                                        | 0.155                     |
| miR-608              | 0.456                                                       | 0.004                     |

|          |       |       |
|----------|-------|-------|
| miR-637  | 0.533 | 0.015 |
| miR-646  | 0.73  | 0.158 |
| miR-662  | 0.8   | 0.234 |
| miR-9-AS | 0.452 | 0.008 |

The fold of changes in miRNA levels in calcitriol-treated cells comparing to control cells is indicated by the ratio of fluorescence of the two samples. For example, a ratio of 0.452 indicates 54.8% decrease of the miRNA in the calcitriol-treated cells.

**List of miRNAs that are detected but not significantly affected by Calcitriol**

| <b>Name of miRNA</b> | <b>Average Fluorescence Ratio<br/>of Calcitriol/Control</b> | <b>Standard Deviation</b> |
|----------------------|-------------------------------------------------------------|---------------------------|
| miR-30e-5p           | 0.905                                                       | 0.089                     |
| miR-452-AS           | 0.906                                                       | 0.172                     |
| miR-30c              | 0.929                                                       | 0.101                     |
| miR-370              | 0.964                                                       | 0.142                     |
| miR-663              | 0.991                                                       | 0.055                     |
| miR-519a             | 1.018                                                       | 0.128                     |
| miR-299-5p           | 1.028                                                       | 0.017                     |
| miR-568              | 1.044                                                       | 0.254                     |
| miR-562              | 1.052                                                       | 0.097                     |
| miR-106b             | 1.111                                                       | 0.162                     |
| miR-589              | 1.149                                                       | 0.015                     |
| miR-619              | 1.154                                                       | 0.022                     |

## List of miRNAs Not Detected in This Study

hsa\_let\_7a  
hsa\_let\_7b  
hsa\_let\_7c  
hsa\_let\_7d  
hsa\_let\_7e  
hsa\_let\_7f  
hsa\_let\_7i  
hsa\_miR\_1  
hsa\_miR\_100  
hsa\_miR\_101  
hsa\_miR\_103  
hsa\_miR\_105  
hsa\_miR\_106a  
hsa\_miR\_107  
hsa\_miR\_10a  
hsa\_miR\_10b  
hsa\_miR\_122a  
hsa\_miR\_124a  
hsa\_miR\_125b  
hsa\_miR\_126  
hsa\_miR\_126\_AS  
hsa\_miR\_127  
hsa\_miR\_128a  
hsa\_miR\_128b  
hsa\_miR\_129  
hsa\_miR\_130a  
hsa\_miR\_130b  
hsa\_miR\_132  
hsa\_miR\_133a  
hsa\_miR\_134  
hsa\_miR\_135a  
hsa\_miR\_136  
hsa\_miR\_137  
hsa\_miR\_138  
hsa\_miR\_140  
hsa\_miR\_141  
hsa\_miR\_142\_3p  
hsa\_miR\_142\_5p  
hsa\_miR\_143  
hsa\_miR\_144  
hsa\_miR\_145  
hsa\_miR\_146a  
hsa\_miR\_146b

hsa\_miR\_147  
hsa\_miR\_148a  
hsa\_miR\_148b  
hsa\_miR\_149  
hsa\_miR\_150  
hsa\_miR\_151  
hsa\_miR\_152  
hsa\_miR\_153  
hsa\_miR\_154\_AS  
hsa\_miR\_155  
hsa\_miR\_15a  
hsa\_miR\_15b  
hsa\_miR\_16  
hsa\_miR\_17\_3p  
hsa\_miR\_17\_5p  
hsa\_miR\_181a  
hsa\_miR\_181a\_AS  
hsa\_miR\_181b  
hsa\_miR\_181c  
hsa\_miR\_181d  
hsa\_miR\_182  
hsa\_miR\_182\_AS  
hsa\_miR\_183  
hsa\_miR\_184  
hsa\_miR\_185  
hsa\_miR\_186  
hsa\_miR\_187  
hsa\_miR\_188  
hsa\_miR\_189  
hsa\_miR\_18a  
hsa\_miR\_18a\_AS  
hsa\_miR\_18b  
hsa\_miR\_190  
hsa\_miR\_191  
hsa\_miR\_191\_AS  
hsa\_miR\_192  
hsa\_miR\_193a  
hsa\_miR\_193b  
hsa\_miR\_194  
hsa\_miR\_195  
hsa\_miR\_196b  
hsa\_miR\_197  
hsa\_miR\_198  
hsa\_miR\_199a  
hsa\_miR\_199a\_AS  
hsa\_miR\_199b  
hsa\_miR\_19a



hsa\_miR\_19b  
hsa\_miR\_200a  
hsa\_miR\_200a\_AS  
hsa\_miR\_200b  
hsa\_miR\_200c  
hsa\_miR\_202  
hsa\_miR\_202\_AS  
hsa\_miR\_203  
hsa\_miR\_204  
hsa\_miR\_205  
hsa\_miR\_206  
hsa\_miR\_208  
hsa\_miR\_20a  
hsa\_miR\_20b  
hsa\_miR\_21  
hsa\_miR\_210  
hsa\_miR\_211  
hsa\_miR\_212  
hsa\_miR\_214  
hsa\_miR\_215  
hsa\_miR\_216  
hsa\_miR\_217  
hsa\_miR\_218  
hsa\_miR\_219  
hsa\_miR\_22  
hsa\_miR\_220  
hsa\_miR\_221  
hsa\_miR\_222  
hsa\_miR\_223  
hsa\_miR\_224  
hsa\_miR\_23a  
hsa\_miR\_23b  
hsa\_miR\_24  
hsa\_miR\_25  
hsa\_miR\_26b  
hsa\_miR\_27a  
hsa\_miR\_27b  
hsa\_miR\_297  
hsa\_miR\_299\_3p  
hsa\_miR\_29a  
hsa\_miR\_29b  
hsa\_miR\_29c  
hsa\_miR\_301  
hsa\_miR\_302a  
hsa\_miR\_302a\_AS  
hsa\_miR\_302b  
hsa\_miR\_302b\_AS

hsa\_miR\_302c  
hsa\_miR\_302c\_AS  
hsa\_miR\_302d  
hsa\_miR\_30a\_3p  
hsa\_miR\_30a\_5p  
hsa\_miR\_30d  
hsa\_miR\_30e\_3p  
hsa\_miR\_31  
hsa\_miR\_32  
hsa\_miR\_320  
hsa\_miR\_323  
hsa\_miR\_324\_3p  
hsa\_miR\_324\_5p  
hsa\_miR\_325  
hsa\_miR\_326  
hsa\_miR\_328  
hsa\_miR\_329  
hsa\_miR\_330  
hsa\_miR\_331  
hsa\_miR\_335  
hsa\_miR\_337  
hsa\_miR\_338  
hsa\_miR\_339  
hsa\_miR\_33b  
hsa\_miR\_340  
hsa\_miR\_342  
hsa\_miR\_345  
hsa\_miR\_34a  
hsa\_miR\_34b  
hsa\_miR\_34c  
hsa\_miR\_361  
hsa\_miR\_362  
hsa\_miR\_363  
hsa\_miR\_363\_AS  
hsa\_miR\_365  
hsa\_miR\_367  
hsa\_miR\_368  
hsa\_miR\_369\_3p  
hsa\_miR\_369\_5p  
hsa\_miR\_371  
hsa\_miR\_372  
hsa\_miR\_373  
hsa\_miR\_373\_AS  
hsa\_miR\_374  
hsa\_miR\_375  
hsa\_miR\_376a  
hsa\_miR\_376a\_AS

hsa\_miR\_376b  
hsa\_miR\_377  
hsa\_miR\_378  
hsa\_miR\_379  
hsa\_miR\_380\_3p  
hsa\_miR\_380\_5p  
hsa\_miR\_381  
hsa\_miR\_382  
hsa\_miR\_383  
hsa\_miR\_384  
hsa\_miR\_409\_3p  
hsa\_miR\_409\_5p  
hsa\_miR\_410  
hsa\_miR\_411  
hsa\_miR\_412  
hsa\_miR\_421  
hsa\_miR\_422a  
hsa\_miR\_422b  
hsa\_miR\_423  
hsa\_miR\_424  
hsa\_miR\_425\_3p  
hsa\_miR\_425\_5p  
hsa\_miR\_429  
hsa\_miR\_431  
hsa\_miR\_432  
hsa\_miR\_432\_AS  
hsa\_miR\_433  
hsa\_miR\_448  
hsa\_miR\_449  
hsa\_miR\_449b  
hsa\_miR\_450  
hsa\_miR\_451  
hsa\_miR\_452  
hsa\_miR\_453  
hsa\_miR\_454\_3p  
hsa\_miR\_454\_5p  
hsa\_miR\_455  
hsa\_miR\_483  
hsa\_miR\_484  
hsa\_miR\_485\_3p  
hsa\_miR\_485\_5p  
hsa\_miR\_486  
hsa\_miR\_487a  
hsa\_miR\_487b  
hsa\_miR\_488  
hsa\_miR\_489  
hsa\_miR\_490

hsa\_miR\_492  
hsa\_miR\_493\_3p  
hsa\_miR\_493\_5p  
hsa\_miR\_494  
hsa\_miR\_495  
hsa\_miR\_496  
hsa\_miR\_497  
hsa\_miR\_498  
hsa\_miR\_500  
hsa\_miR\_501  
hsa\_miR\_502  
hsa\_miR\_503  
hsa\_miR\_504  
hsa\_miR\_505  
hsa\_miR\_506  
hsa\_miR\_507  
hsa\_miR\_508  
hsa\_miR\_509  
hsa\_miR\_510  
hsa\_miR\_511  
hsa\_miR\_512\_3p  
hsa\_miR\_512\_5p  
hsa\_miR\_513  
hsa\_miR\_514  
hsa\_miR\_515\_3p  
hsa\_miR\_515\_5p  
hsa\_miR\_516\_3p  
hsa\_miR\_516\_5p  
hsa\_miR\_517\_AS  
hsa\_miR\_517b  
hsa\_miR\_517c  
hsa\_miR\_518b  
hsa\_miR\_518c  
hsa\_miR\_518c\_AS  
hsa\_miR\_518d  
hsa\_miR\_518e  
hsa\_miR\_518f  
hsa\_miR\_518f\_AS  
hsa\_miR\_519b  
hsa\_miR\_519c  
hsa\_miR\_519d  
hsa\_miR\_519e  
hsa\_miR\_519e\_AS  
hsa\_miR\_520a  
hsa\_miR\_520a\_AS  
hsa\_miR\_520b  
hsa\_miR\_520c

hsa\_miR\_520d  
hsa\_miR\_520d\_AS  
hsa\_miR\_520e  
hsa\_miR\_520f  
hsa\_miR\_520g  
hsa\_miR\_520h  
hsa\_miR\_521  
hsa\_miR\_522  
hsa\_miR\_523  
hsa\_miR\_524  
hsa\_miR\_524\_AS  
hsa\_miR\_525  
hsa\_miR\_525\_AS  
hsa\_miR\_526a  
hsa\_miR\_526b  
hsa\_miR\_526b\_AS  
hsa\_miR\_526c  
hsa\_miR\_527  
hsa\_miR\_539  
hsa\_miR\_542\_3p  
hsa\_miR\_542\_5p  
hsa\_miR\_544  
hsa\_miR\_545  
hsa\_miR\_548a  
hsa\_miR\_548b  
hsa\_miR\_548c  
hsa\_miR\_548d  
hsa\_miR\_550  
hsa\_miR\_551a  
hsa\_miR\_551b  
hsa\_miR\_552  
hsa\_miR\_554  
hsa\_miR\_555  
hsa\_miR\_556  
hsa\_miR\_558  
hsa\_miR\_559  
hsa\_miR\_560  
hsa\_miR\_561  
hsa\_miR\_563  
hsa\_miR\_564  
hsa\_miR\_565  
hsa\_miR\_566  
hsa\_miR\_567  
hsa\_miR\_569  
hsa\_miR\_570  
hsa\_miR\_572  
hsa\_miR\_573

hsa\_miR\_574  
hsa\_miR\_575  
hsa\_miR\_576  
hsa\_miR\_577  
hsa\_miR\_578  
hsa\_miR\_580  
hsa\_miR\_581  
hsa\_miR\_582  
hsa\_miR\_583  
hsa\_miR\_584  
hsa\_miR\_585  
hsa\_miR\_586  
hsa\_miR\_587  
hsa\_miR\_588  
hsa\_miR\_590  
hsa\_miR\_592  
hsa\_miR\_593  
hsa\_miR\_596  
hsa\_miR\_598  
hsa\_miR\_599  
hsa\_miR\_601  
hsa\_miR\_602  
hsa\_miR\_603  
hsa\_miR\_604  
hsa\_miR\_605  
hsa\_miR\_606  
hsa\_miR\_607  
hsa\_miR\_609  
hsa\_miR\_610  
hsa\_miR\_611  
hsa\_miR\_612  
hsa\_miR\_613  
hsa\_miR\_614  
hsa\_miR\_615  
hsa\_miR\_616  
hsa\_miR\_617  
hsa\_miR\_618  
hsa\_miR\_620  
hsa\_miR\_621  
hsa\_miR\_622  
hsa\_miR\_623  
hsa\_miR\_624  
hsa\_miR\_625  
hsa\_miR\_626  
hsa\_miR\_628  
hsa\_miR\_629  
hsa\_miR\_630

hsa\_miR\_631  
hsa\_miR\_632  
hsa\_miR\_633  
hsa\_miR\_634  
hsa\_miR\_635  
hsa\_miR\_636  
hsa\_miR\_638  
hsa\_miR\_639  
hsa\_miR\_640  
hsa\_miR\_641  
hsa\_miR\_642  
hsa\_miR\_643  
hsa\_miR\_644  
hsa\_miR\_645  
hsa\_miR\_647  
hsa\_miR\_648  
hsa\_miR\_649  
hsa\_miR\_650  
hsa\_miR\_651  
hsa\_miR\_652  
hsa\_miR\_653  
hsa\_miR\_654  
hsa\_miR\_655  
hsa\_miR\_656  
hsa\_miR\_657  
hsa\_miR\_658  
hsa\_miR\_659  
hsa\_miR\_660  
hsa\_miR\_661  
hsa\_miR\_668  
hsa\_miR\_671  
hsa\_miR\_675  
hsa\_miR\_7  
hsa\_miR\_758  
hsa\_miR\_765  
hsa\_miR\_766  
hsa\_miR\_767\_3p  
hsa\_miR\_767\_5p  
hsa\_miR\_768\_3p  
hsa\_miR\_768\_5p  
hsa\_miR\_769\_3p  
hsa\_miR\_769\_5p  
hsa\_miR\_770\_5p  
hsa\_miR\_801  
hsa\_miR\_802  
hsa\_miR\_9  
hsa\_miR\_92

hsa\_miR\_92b  
hsa\_miR\_93  
hsa\_miR\_95  
hsa\_miR\_96  
hsa\_miR\_98  
hsa\_miR\_99a  
hsa\_miR\_99b



Supplementary Table 2

| ID  | TUMOR OR NON TUMOR     | GRADE                     | PATH STAGE | NODES POSITIVE | NODES EXAM | LEFT OR RIGHT COLON |
|-----|------------------------|---------------------------|------------|----------------|------------|---------------------|
| NT1 | non tumor colon mucosa |                           |            |                |            | Left Colon          |
| NT2 | non tumor colon mucosa |                           |            |                |            | Left Colon          |
| NT3 | non tumor colon mucosa |                           |            |                |            | Right colon         |
| NT4 | non tumor colon mucosa |                           |            |                |            | Left Colon          |
| NT5 | non tumor colon mucosa |                           |            |                |            | Colon NOS           |
| NT6 | non tumor colon mucosa |                           |            |                |            | Left Colon          |
| T1  | Adenocarcinoma         | Moderately differentiated | 2          | 0              | 25         | Left Colon          |
| T10 | Adenocarcinoma         | Moderately differentiated | 4          | 0              | 13         | Right colon         |
| T11 | Adenocarcinoma         | Moderately differentiated | 4          | 0              | 19         | Right colon         |
| T12 | Adenocarcinoma         | Moderately differentiated | 3          | 6              | 20         | Left Colon          |
| T13 | Adenocarcinoma         | Moderately differentiated | 4          | 2              | 14         | Left Colon          |
| T14 | Adenocarcinoma         | Poorly differentiated     | 2          | 0              | 11         | Left Colon          |
| T15 | Adenocarcinoma         | Moderately differentiated | 4          | 9              | 55         | Right colon         |
| T16 | Adenocarcinoma         | Moderately differentiated | 4          | 9              | 55         | Right colon         |
| T17 | Adenocarcinoma         | Moderately differentiated | 2          | 0              | 33         | Transverse colon    |
| T18 | Adenocarcinoma         | Moderately differentiated | 4          | 0              | 22         | Left Colon          |
| T2  | Adenocarcinoma         | Moderately differentiated | 2          | 0              | 30         | Left Colon          |
| T3  | Adenocarcinoma         | Moderately differentiated | 3          | 10             | 11         | Right colon         |
| T4  | Adenocarcinoma         | Poorly differentiated     | 3          | 3              | 18         | Transverse colon    |
| T5  | Adenocarcinoma         | Moderately differentiated | 4          | 4              | 20         | Right colon         |
| T6  | Adenocarcinoma         | Moderately differentiated | 4          | 9              | 55         | Right colon         |
| T7  | Adenocarcinoma         | Moderately differentiated | 3          | 1              | 15         | Right colon         |
| T8  | Adenocarcinoma         | Moderately differentiated | 4          | 0              | 14         | Left Colon          |
| T9  | Adenocarcinoma         | Moderately differentiated | 1          | 0              | 7          | Left Colon          |
